# Supplementary material for: Synthesis and characterization of the Anderson–Evans tungsto­anti­monate [Na5(H2O)18{(HOCH2)2CHNH3}2][SbW6O24]
Source: PubMed Central journal article supplement (PMC8254527; doi:10.1107/s2053229621006239), 2021-06-28

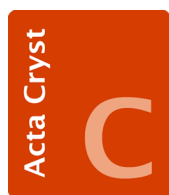

STRUCTURAL  
CHEMISTRY

**Volume 77 (2021)**

**Supporting information for article:**

**Synthesis and characterization of the Anderson–Evans tungstoantimonate  $[\text{Na}_5(\text{H}_2\text{O})_{18}\{(\text{HOCH}_2)_2\text{CHNH}_3\}_2][\text{SbW}_6\text{O}_{24}]$**

**Kleanthi Sifaki, Nadiia I. Gumerova, Gerald Giester and Annette Rompel**

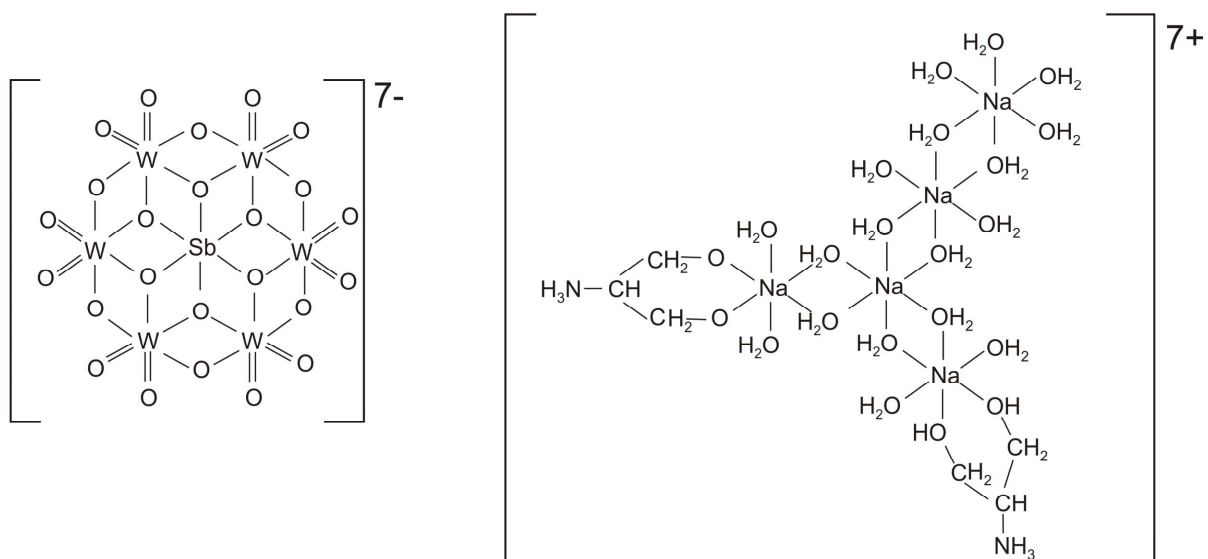

Supplement: c-77-00420-sup3.pdf [file c-77-00420-sup3.pdf]
